# Supplementary material for: Establishing an In Vitro System to Assess How Specific Antibodies Drive the Evolution of Foot-and-Mouth Disease Virus
Source: MDPI journal article supplement (doi:10.3390/v14081820), 2022-08-19
Supplement: s1 [file s1]

Supplementary Table S1. Sample groups sequenced on separate Illumina MiSeq runs. Each sequencing run contained a starting virus sample and a viral passage series grown in the presence of a Field, Challenged or Control sera.

|         |                | Serum groups |            |         |
|---------|----------------|--------------|------------|---------|
|         | Starting virus | Field        | Challenged | Control |
| Group 1 | One            | 3157         | 4926       | 4926C   |
| Group 2 | Two            | 3817         | 4914       | 4914C   |
| Group 3 | Three          | 3159         | 4942       | 4942C   |
