# Supplementary material for: Establishing an In Vitro System to Assess How Specific Antibodies Drive the Evolution of Foot-and-Mouth Disease Virus
Source: MDPI journal article supplement (doi:10.3390/v14081820), 2022-08-19
Supplement: s1 [file s1]

Supplementary Table S3a. Sequence and alignment statistics of each starting virus samples (including technical replicates).

|                | Sample  | Replicate | Total reads          | Mapped reads | Mean coverage        | Frequency cut-off |
|----------------|---------|-----------|----------------------|--------------|----------------------|-------------------|
| Starting virus | Start 1 | 1         | 5.52x10 <sup>5</sup> | 97.83%       | 2.06x10 <sup>4</sup> | 0.20%             |
|                |         | 2         | 6.35x10 <sup>5</sup> | 97.07%       | 2.35x10 <sup>4</sup> |                   |
|                | Start 2 | 1         | 2.42x10 <sup>5</sup> | 98.79%       | 8.44x10 <sup>4</sup> | 0.50%             |
|                |         | 2         | 2.78x10 <sup>5</sup> | 98.57%       | 9.53x10 <sup>4</sup> |                   |
|                | Start 3 | 1         | 3.42x10 <sup>5</sup> | 99.10%       | 1.29x10 <sup>4</sup> | 0.50%             |
|                |         | 2         | 3.61x10 <sup>5</sup> | 98.86%       | 1.36x10 <sup>4</sup> |                   |

Supplementary Table S3b. Sequence and alignment statistics of each sample (including technical replicates) within the Field group. Due to the low number of generated reads, sample Field-3817-P2 (highlighted in grey) was removed from downstream analysis.

|       | Sample | Passage | Replicate | Total reads          | Mapped reads | Mean coverage        | Frequency cut-off |
|-------|--------|---------|-----------|----------------------|--------------|----------------------|-------------------|
| Field | 3159   | 1       | 1         | 4.58x10 <sup>5</sup> | 98.98%       | 1.75x10 <sup>4</sup> | 0.50%             |
|       |        |         | 2         | 4.12x10 <sup>5</sup> | 98.74%       | 1.56x10 <sup>4</sup> |                   |
|       |        | 2       | 1         | 4.60x10 <sup>5</sup> | 98.87%       | 1.74x10 <sup>4</sup> | 0.50%             |
|       |        |         | 2         | 2.27x10 <sup>5</sup> | 97.86%       | 8.15x10 <sup>3</sup> |                   |
|       |        | 3       | 1         | 2.86x10 <sup>5</sup> | 99.17%       | 1.08x10 <sup>4</sup> | 0.50%             |
|       |        |         | 2         | 8.34x10 <sup>5</sup> | 99.05%       | 2.98x10 <sup>3</sup> |                   |
|       |        | 4       | 1         | 3.28x10 <sup>5</sup> | 98.88%       | 1.25x10 <sup>4</sup> | 0.50%             |
|       |        |         | 2         | 4.54x10 <sup>5</sup> | 98.87%       | 1.71x10 <sup>4</sup> |                   |
|       | 3157   | 1       | 1         | 3.67x10 <sup>5</sup> | 93.38%       | 1.31x10 <sup>4</sup> | 0.20%             |
|       |        |         | 2         | 1.20x10 <sup>5</sup> | 75.20%       | 3.28x10 <sup>3</sup> |                   |
|       |        | 2       | 1         | 3.36x10 <sup>5</sup> | 95.10%       | 1.21x10 <sup>4</sup> | 0.20%             |
|       |        |         | 2         | 3.34x10 <sup>5</sup> | 96.22%       | 1.21x10 <sup>4</sup> |                   |
|       | 3817   | 1       | 1         | 1.98x10 <sup>5</sup> | 98.77%       | 6.99x10 <sup>3</sup> | 0.50%             |
|       |        |         | 2         | 2.13x10 <sup>5</sup> | 98.87%       | 7.48x10 <sup>3</sup> |                   |
|       |        | 2       | 1         | 2.25x10 <sup>5</sup> | 99.22%       | 7.96x10 <sup>3</sup> | 0.80%             |
|       |        |         | 2         | 2.31x10 <sup>3</sup> | 3.45%        | 2.64x10 <sup>0</sup> |                   |
|       |        | 3       | 1         | 1.92x10 <sup>5</sup> | 99.10%       | 6.87x10 <sup>3</sup> | 0.50%             |
|       |        |         | 2         | 2.04x10 <sup>5</sup> | 99.29%       | 7.32x10 <sup>3</sup> |                   |
|       |        | 4       | 1         | 2.74x10 <sup>5</sup> | 99.52%       | 9.83x10 <sup>3</sup> | 0.50%             |
|       |        |         | 2         | 3.21x10 <sup>5</sup> | 99.47%       | 1.15x10 <sup>4</sup> |                   |

Supplementary Table S3c. Sequence and alignment statistics of each sample (including technical replicates) within Challenged group.

|            | Sample | Passage | Replicate | Total reads          | Mapped reads | Mean coverage        | Frequency cut-off |
|------------|--------|---------|-----------|----------------------|--------------|----------------------|-------------------|
| Challenged | 4942   | 1       | 1         | 4.24x10 <sup>5</sup> | 98.44%       | 1.58x10 <sup>4</sup> | 0.50%             |
|            |        |         | 2         | 3.75x10 <sup>5</sup> | 98.37%       | 1.39x10 <sup>4</sup> |                   |
|            |        | 2       | 1         | 4.74x10 <sup>5</sup> | 98.94%       | 1.80x10 <sup>4</sup> | 0.50%             |
|            |        |         | 2         | 3.85x10 <sup>5</sup> | 98.71%       | 1.41x10 <sup>4</sup> |                   |
|            |        | 3       | 1         | 3.39x10 <sup>5</sup> | 98.73%       | 1.28x10 <sup>4</sup> | 0.50%             |
|            |        |         | 2         | 5.52x10 <sup>5</sup> | 98.84%       | 2.08x10 <sup>4</sup> |                   |
|            |        | 4       | 1         | 3.94x10 <sup>5</sup> | 98.63%       | 1.50x10 <sup>4</sup> | 0.50%             |
|            |        |         | 2         | 4.11x10 <sup>5</sup> | 98.87%       | 1.57x10 <sup>4</sup> |                   |
|            | 4926   | 1       | 1         | 5.12x10 <sup>5</sup> | 96.56%       | 1.88x10 <sup>4</sup> | 0.20%             |
|            |        |         | 2         | 3.57x10 <sup>5</sup> | 96.20%       | 1.31x10 <sup>4</sup> |                   |
|            |        | 2       | 1         | 5.35x10 <sup>5</sup> | 96.42%       | 1.98x10 <sup>4</sup> | 0.20%             |
|            |        |         | 2         | 4.83x10 <sup>5</sup> | 95.36%       | 1.76x10 <sup>4</sup> |                   |
|            |        | 3       | 1         | 4.45x10 <sup>5</sup> | 98.42%       | 1.67x10 <sup>4</sup> | 0.20%             |
|            |        |         | 2         | 1.13x10 <sup>5</sup> | 97.49%       | 4.22x10 <sup>4</sup> |                   |
|            |        | 4       | 1         | 3.29x10 <sup>5</sup> | 94.36%       | 1.17x10 <sup>4</sup> | 0.20%             |
|            |        |         | 2         | 4.80x10 <sup>5</sup> | 96.61%       | 1.77x10 <sup>4</sup> |                   |
|            | 4914   | 1       | 1         | 3.39x10 <sup>5</sup> | 99.22%       | 1.21x10 <sup>4</sup> | 0.50%             |
|            |        |         | 2         | 2.40x10 <sup>5</sup> | 99.23%       | 8.47x10 <sup>4</sup> |                   |
|            |        | 2       | 1         | 3.49x10 <sup>5</sup> | 99.38%       | 1.25x10 <sup>4</sup> | 0.50%             |
|            |        |         | 2         | 3.56x10 <sup>5</sup> | 99.34%       | 1.27x10 <sup>4</sup> |                   |
|            |        | 3       | 1         | 2.87x10 <sup>5</sup> | 99.00%       | 1.01x10 <sup>4</sup> | 0.50%             |
|            |        |         | 2         | 2.49x10 <sup>5</sup> | 99.38%       | 8.88x10 <sup>4</sup> |                   |
|            |        | 4       | 1         | 6.19x10 <sup>5</sup> | 99.16%       | 2.26x10 <sup>4</sup> | 0.50%             |
|            |        |         | 2         | 5.51x10 <sup>5</sup> | 99.06%       | 2.02x10 <sup>4</sup> |                   |

Supplementary Table S3d. Sequence and alignment statistics of each sample (including technical replicates) within Control group.

|         | Sampl<br>e | Passag<br>e | Replicate | Total<br>reads       | Mapped<br>reads | Mean<br>coverage     | Frequency<br>cut-off |
|---------|------------|-------------|-----------|----------------------|-----------------|----------------------|----------------------|
| Control | 4942C      | 1           | 1         | 3.01x10 <sup>5</sup> | 99.35%          | 1.17x10 <sup>4</sup> | 0.50%                |
|         |            |             | 2         | 2.43x10 <sup>5</sup> | 99.34%          | 0.41x10 <sup>3</sup> |                      |
|         |            | 2           | 1         | 2.80x10 <sup>5</sup> | 99.02%          | 1.08x10 <sup>4</sup> | 0.50%                |
|         |            |             | 2         | 1.75x10 <sup>5</sup> | 99.49%          | 6.74x10 <sup>3</sup> |                      |
|         |            | 3           | 1         | 5.24x10 <sup>5</sup> | 98.45%          | 1.98x10 <sup>4</sup> | 0.20%                |
|         |            |             | 2         | 4.72x10 <sup>5</sup> | 98.46%          | 1.77x10 <sup>4</sup> |                      |
|         |            | 4           | 1         | 3.89x10 <sup>5</sup> | 98.49%          | 1.44x10 <sup>4</sup> | 0.20%                |
|         |            |             | 2         | 2.74x10 <sup>5</sup> | 98.48%          | 1.00x10 <sup>4</sup> |                      |
|         | 4926C      | 1           | 1         | 5.91x10 <sup>5</sup> | 96.38%          | 2.19x10 <sup>4</sup> | 0.20%                |
|         |            |             | 2         | 5.71x10 <sup>5</sup> | 95.91%          | 2.09x10 <sup>4</sup> |                      |
|         |            | 2           | 1         | 4.39x10 <sup>5</sup> | 97.71%          | 1.64x10 <sup>4</sup> | 0.20%                |
|         |            |             | 2         | 4.52x10 <sup>5</sup> | 98.46%          | 1.68x10 <sup>4</sup> |                      |
|         |            | 3           | 1         | 3.70x10 <sup>5</sup> | 98.31%          | 1.39x10 <sup>4</sup> | 0.20%                |
|         |            |             | 2         | 3.69x10 <sup>5</sup> | 97.88%          | 1.38x10 <sup>4</sup> |                      |
|         |            | 4           | 1         | 5.60x10 <sup>5</sup> | 98.92%          | 2.13x10 <sup>4</sup> | 0.20%                |
|         |            |             | 2         | 5.57x10 <sup>5</sup> | 98.60%          | 2.08x10 <sup>4</sup> |                      |
|         | 4914C      | 1           | 1         | 3.24x10 <sup>5</sup> | 97.67%          | 1.10x10 <sup>4</sup> | 0.50%                |
|         |            |             | 2         | 1.16x10 <sup>5</sup> | 98.63%          | 3.92x10 <sup>3</sup> |                      |
|         |            | 2           | 1         | 2.46x10 <sup>5</sup> | 98.63%          | 8.46x10 <sup>3</sup> | 0.50%                |
|         |            |             | 2         | 2.47x10 <sup>5</sup> | 98.06%          | 8.46x10 <sup>3</sup> |                      |
|         |            | 3           | 1         | 3.25x10 <sup>5</sup> | 97.61%          | 1.09x10 <sup>4</sup> | 0.50%                |
|         |            |             | 2         | 2.93x10 <sup>5</sup> | 98.36%          | 1.01x10 <sup>4</sup> |                      |
|         |            | 4           | 1         | 2.28x10 <sup>5</sup> | 99.21%          | 8.20x10 <sup>3</sup> | 0.50%                |
|         |            |             | 2         | 2.01x10 <sup>5</sup> | 98.72%          | 6.92x10 <sup>3</sup> |                      |
