# Supplementary material for: Establishing an In Vitro System to Assess How Specific Antibodies Drive the Evolution of Foot-and-Mouth Disease Virus
Source: MDPI journal article supplement (doi:10.3390/v14081820), 2022-08-19
Supplement: s1 [file s1]

Supplementary Table S2. The plaque assay PFU, qRT-PCR copy numbers, PCR cycles used and the Qubit quantification of amplified DNA for each virus isolate sample sequence in this study.

ND = Not done

|                  | Sample   | Passage | Plaque assay         | qRT-PCR              | PCR amplification |       |
|------------------|----------|---------|----------------------|----------------------|-------------------|-------|
|                  |          |         | PFU/ml               | Copies/ $\mu$ l      | PCR cycles        | Qubit |
| Starting Virus   | Sample 1 | NA      | 4.66x10 <sup>7</sup> | 1.01x10 <sup>8</sup> | 26                | 0.42  |
|                  | Sample 2 |         |                      | 1.51x10 <sup>8</sup> | 32                | 0.71  |
|                  | Sample 3 |         |                      | 2.30x10 <sup>8</sup> | 36                | 2.02  |
| Field Serum      | 3159     | 1       | 2.95x10 <sup>7</sup> | 1.04x10 <sup>8</sup> | 36                | 2.19  |
|                  |          | 2       | 2.40x10 <sup>7</sup> | 1.20x10 <sup>8</sup> | 36                | 1.51  |
|                  |          | 3       | 2.40x10 <sup>7</sup> | 2.55x10 <sup>8</sup> | 36                | 0.75  |
|                  |          | 4       | ND                   | 1.07x10 <sup>8</sup> | 36                | 1.50  |
|                  | 3157     | 1       | 2.06x10 <sup>7</sup> | 2.30x10 <sup>8</sup> | 26                | 0.21  |
|                  |          | 2       | ND                   | 8.81x10 <sup>7</sup> | 26                | 0.66  |
|                  | 3817     | 1       | 3.00x10 <sup>7</sup> | 1.81x10 <sup>8</sup> | 32                | 0.20  |
|                  |          | 2       | 2.57x10 <sup>7</sup> | 1.81x10 <sup>8</sup> | 32                | 0.19  |
|                  |          | 3       | 3.56x10 <sup>7</sup> | 1.55x10 <sup>8</sup> | 32                | 0.27  |
|                  |          | 4       | 1.23x10 <sup>7</sup> | 1.24x10 <sup>8</sup> | 32                | 0.39  |
| Challenged serum | 4942     | 1       | 3.10x10 <sup>6</sup> | 1.78x10 <sup>8</sup> | 36                | 1.88  |
|                  |          | 2       | 5.66x10 <sup>6</sup> | 7.09x10 <sup>7</sup> | 36                | 2.54  |
|                  |          | 3       | 6.00x10 <sup>6</sup> | 1.10x10 <sup>8</sup> | 36                | 0.93  |
|                  |          | 4       | 1.33x10 <sup>7</sup> | 1.28x10 <sup>7</sup> | 36                | 2.94  |
|                  | 4926     | 1       | 6.36x10 <sup>6</sup> | 1.38x10 <sup>8</sup> | 26                | 0.69  |
|                  |          | 2       | 6.22x10 <sup>6</sup> | 8.08x10 <sup>7</sup> | 26                | 0.31  |
|                  |          | 3       | 4.50x10 <sup>7</sup> | 1.29x10 <sup>8</sup> | 26                | 0.76  |
|                  |          | 4       | 2.26x10 <sup>7</sup> | 9.17x10 <sup>7</sup> | 26                | 0.27  |
|                  | 4914     | 1       | 1.43x10 <sup>7</sup> | 1.42x10 <sup>8</sup> | 32                | 0.28  |
|                  |          | 2       | 7.90x10 <sup>6</sup> | 2.00x10 <sup>8</sup> | 32                | 0.61  |
|                  |          | 3       | 3.60x10 <sup>7</sup> | 2.08x10 <sup>8</sup> | 32                | 0.40  |
|                  |          | 4       | ND                   | 1.27x10 <sup>8</sup> | 32                | 0.49  |
| Control serum    | 4942C    | 1       | 3.20x10 <sup>7</sup> | 2.74x10 <sup>8</sup> | 36                | 0.87  |
|                  |          | 2       | 1.73x10 <sup>7</sup> | 8.66x10 <sup>7</sup> | 36                | 0.20  |
|                  |          | 3       | 3.36x10 <sup>7</sup> | 1.48x10 <sup>8</sup> | 36                | 32.03 |
|                  |          | 4       | 2.16x10 <sup>7</sup> | 9.05x10 <sup>7</sup> | 36                | 23.51 |
|                  | 4926C    | 1       | 1.16x10 <sup>7</sup> | 1.04x10 <sup>8</sup> | 26                | 0.51  |
|                  |          | 2       | 2.23x10 <sup>7</sup> | 2.46x10 <sup>8</sup> | 26                | 1.54  |
|                  |          | 3       | 4.50x10 <sup>7</sup> | 1.68x10 <sup>8</sup> | 26                | 1.17  |
|                  |          | 4       | ND                   | 2.41x10 <sup>8</sup> | 26                | 1.27  |
|                  | 4914C    | 1       | 8.00x10 <sup>7</sup> | 1.30x10 <sup>8</sup> | 32                | 0.36  |
|                  |          | 2       | 2.33x10 <sup>7</sup> | 1.82x10 <sup>8</sup> | 32                | 0.32  |
|                  |          | 3       | 2.53x10 <sup>7</sup> | 1.96x10 <sup>8</sup> | 32                | 0.35  |
|                  |          | 4       | 2.36x10 <sup>7</sup> | 1.65x10 <sup>8</sup> | 32                | 0.33  |
